# Supplementary material for: Distribution and Pathogenicity of Two Cutthroat Trout Virus (CTV) Genotypes in Canada
Source: MDPI journal article supplement (doi:10.3390/v13091730), 2021-08-31
Supplement: s1 [file s1]

Supplementary Materials:

**Table S1. Piscihepevirus isolations from salmonids in Canada from 2010-2017.**

| <b>Genotype</b> | <b>Host</b>     | <b>Location</b>      | <b>Year</b> | <b>Isolate name</b> | <b>GenBank accession number</b> |
|-----------------|-----------------|----------------------|-------------|---------------------|---------------------------------|
| CTV-1           | Atlantic salmon | New Brunswick        | 2010        | CA/NB/2010-214/AtS  | MZ438685                        |
|                 | Rainbow trout   | Quebec               | 2011        | CA/QC/2011-197/Rbt  | MZ243139                        |
|                 | Arctic char     | Quebec               | 2013        | CA/QC/2013-181/ArC  | MZ243138                        |
|                 | Rainbow Trout   | Prince Edward Island | 2015        | CA/PE/2015-143/Rbt  | MZ243137                        |
|                 | Atlantic salmon | Nova Scotia          | 2010        | CA/NS/2010-67/AtS   | MZ243115                        |
|                 | Atlantic salmon | New Brunswick        | 2010        | CA/NB/2010-130/AtS  | MZ243114                        |
|                 | Atlantic salmon | New Brunswick        | 2010        | CA/NB/2010-133/AtS  | MZ243135                        |
|                 | Atlantic salmon | Prince Edward Island | 2010        | CA/PE/2010-174/AtS  | MZ243094                        |
|                 | Atlantic salmon | New Brunswick        | 2010        | CA/NB/2010-200/AtS  | MZ243109                        |
|                 | Atlantic salmon | Prince Edward Island | 2010        | CA/PE/2010-204/AtS  | MZ438686                        |
|                 | Atlantic salmon | Nova Scotia          | 2011        | CA/NS/2011-01/AtS   | MZ243136                        |
|                 | Atlantic salmon | New Brunswick        | 2011        | CA/NB/2011-06/AtS   | MZ438687                        |
|                 | Atlantic salmon | New Brunswick        | 2011        | CA/NB/2011-22/AtS   | MZ243134                        |

|                 |                      |      |                    |          |
|-----------------|----------------------|------|--------------------|----------|
| Atlantic salmon | New Brunswick        | 2011 | CA/NB/2011-25/AtS  | MZ243113 |
| Atlantic salmon | New Brunswick        | 2011 | CA/NB/2011-26/AtS  | MZ243132 |
| Atlantic salmon | New Brunswick        | 2011 | CA/NB/2011-27/AtS  | MZ243125 |
| Atlantic salmon | Nova Scotia          | 2011 | CA/NS/2011-104/AtS | MZ243103 |
| Atlantic salmon | Nova Scotia          | 2011 | CA/NS/2011-138/AtS | MZ243108 |
| Atlantic salmon | Prince Edward Island | 2011 | CA/PE/2011-156/AtS | MZ243128 |
| Atlantic salmon | Nova Scotia          | 2011 | CA/NS/2011-172/AtS | MZ438688 |
| Atlantic salmon | Prince Edward Island | 2011 | CA/PE/2011-218/AtS | MZ243093 |
| Atlantic salmon | Prince Edward Island | 2011 | CA/PE/2011-241/AtS | MZ243112 |
| Atlantic salmon | Prince Edward Island | 2011 | CA/PE/2011-242/AtS | MZ243107 |
| Atlantic salmon | New Brunswick        | 2011 | CA/NB/2011-251/AtS | MZ243111 |
| Atlantic salmon | New Brunswick        | 2011 | CA/NB/2011-252/AtS | MZ243117 |
| Atlantic salmon | New Brunswick        | 2011 | CA/NB/2011-263/AtS | MZ243133 |
| Atlantic salmon | New Brunswick        | 2012 | CA/NB/2012-01/AtS  | MZ243126 |
| Atlantic salmon | New Brunswick        | 2012 | CA/NB/2012-25/AtS  | MZ243096 |
| Atlantic salmon | Nova Scotia          | 2012 | CA/NS/2012-84/AtS  | MZ243120 |

|        |                 |                      |      |                    |          |
|--------|-----------------|----------------------|------|--------------------|----------|
| CTV-2b | Atlantic salmon | Nova Scotia          | 2012 | CA/NS/2012-91/AtS  | MZ243102 |
|        | Atlantic salmon | New Brunswick        | 2012 | CA/NB/2012-99/AtS  | MZ438689 |
|        | Atlantic salmon | New Brunswick        | 2012 | CA/NB/2012-244/AtS | MZ243116 |
|        | Atlantic salmon | Prince Edward Island | 2013 | CA/PE/2013-02/AtS  | MZ243092 |
|        | Atlantic salmon | New Brunswick        | 2013 | CA/NB/2013-16/AtS  | MZ243095 |
|        | Atlantic salmon | Nova Scotia          | 2013 | CA/NS/2013-20/AtS  | MZ243106 |
|        | Atlantic salmon | Nova Scotia          | 2013 | CA/NS/2013-21/AtS  | MZ243105 |
|        | Atlantic salmon | Nova Scotia          | 2013 | CA/NS/2013-22/AtS  | MZ243104 |
|        | Atlantic salmon | Prince Edward Island | 2013 | CA/PE/2013-23/AtS  | MZ243129 |
|        | Atlantic salmon | New Brunswick        | 2013 | CA/NB/2013-31/AtS  | MZ438690 |
|        | Atlantic salmon | New Brunswick        | 2013 | CA/NB/2013-37/AtS  | MZ243100 |
|        | Atlantic salmon | New Brunswick        | 2013 | CA/NB/2013-40/AtS  | MZ243110 |
|        | Atlantic salmon | Prince Edward Island | 2013 | CA/PE/2013-202/AtS | MZ243124 |
|        | Atlantic salmon | Prince Edward Island | 2013 | CA/PE/2013-205/AtS | MZ243099 |
|        | Atlantic salmon | Nova Scotia          | 2014 | CA/NS/2014-12/AtS  | MZ243127 |
|        | Atlantic salmon | New Brunswick        | 2014 | CA/NB/2014-18/AtS  | MZ243091 |

|                 |                      |      |                    |          |
|-----------------|----------------------|------|--------------------|----------|
| Atlantic salmon | New Brunswick        | 2014 | CA/NB/2014-102/AtS | MZ243123 |
| Atlantic salmon | Nova Scotia          | 2014 | CA/NS/2014-139/AtS | MZ243131 |
| Atlantic salmon | Prince Edward Island | 2014 | CA/PE/2014-143/AtS | MZ243090 |
| Atlantic salmon | Prince Edward Island | 2014 | CA/PE/2014-154/AtS | MZ243098 |
| Atlantic salmon | New Brunswick        | 2014 | CA/NB/2014-166/AtS | MZ243101 |
| Atlantic salmon | New Brunswick        | 2015 | CA/NB/2015-13/AtS  | MZ243122 |
| Atlantic salmon | New Brunswick        | 2015 | CA/NB/2015-21/AtS  | MZ438691 |
| Atlantic salmon | Nova Scotia          | 2015 | CA/NS/2015-46/AtS  | MZ243130 |
| Atlantic salmon | Prince Edward Island | 2015 | CA/PE/2015-145/AtS | MZ243097 |
| Atlantic salmon | Prince Edward Island | 2015 | CA/PE/2015-149/AtS | MZ243118 |
| Atlantic salmon | New Brunswick        | 2015 | CA/NB/2015-158/AtS | MZ243121 |
| Atlantic salmon | Nova Scotia          | 2015 | CA/NS/2015-165/AtS | MZ243119 |
| Rainbow Trout   | Prince Edward Island | 2015 | CA/PE/2015-143/Rbt | MZ243137 |
| Atlantic salmon | New Brunswick        | 2016 | CA/NB/2016-05/AtS  | MZ243089 |
| Atlantic salmon | British Columbia     | 2017 | CA/BC/2017-111/AtS | MZ438692 |

---

**Table S2.** Information of selected hepevirus complete genome sequences used in phylogenetic analyses presented in this study

| Genus                 | Species                 | Genotype | Origin of reference<br>isolate (isolate name) | Predominant host                      | GenBank accession |
|-----------------------|-------------------------|----------|-----------------------------------------------|---------------------------------------|-------------------|
| <b>From GenBank</b>   |                         |          |                                               |                                       |                   |
| <i>Orthohepevirus</i> |                         |          |                                               |                                       |                   |
|                       | <i>Orthohepevirus A</i> | HEV-A1   | Burma                                         | Human                                 | M73218            |
|                       |                         | HEV-A2   | Mexico                                        | Human                                 | M74506            |
|                       |                         | HEV-A3   | United States                                 | Human, pig, rabbit, deer,<br>mongoose | AF082843          |
|                       |                         | HEV-A4   | China                                         | Human, pig                            | AJ272108          |
|                       |                         | HEV-A5   | Japan                                         | Wild boar                             | AB573435          |
|                       |                         | HEV-A6   | Japan                                         | Wild boar                             | AB602441          |
|                       |                         | HEV-A7   | United Arab Emirates                          | Camel                                 | KJ496143          |
|                       | <i>Orthohepevirus B</i> |          | United States                                 | Chicken                               | AY535004          |
|                       | <i>Orthohepevirus C</i> | HEV-C1   | Germany                                       | Rat                                   | GU345042          |

|                       |                         |        |               |        |          |
|-----------------------|-------------------------|--------|---------------|--------|----------|
|                       |                         | HEV-C2 | Netherlands   | Ferret | JN998606 |
|                       | <i>Orthohepevirus D</i> |        | Germany       | Bat    | JQ001749 |
| <i>Piscihepevirus</i> |                         |        |               |        |          |
|                       | <i>Piscihepevirus A</i> | CTV-1  | United States | Trout  | HQ731075 |
|                       |                         | CTV-2a | Canada        | Salmon | MN995808 |
| <b>In this study</b>  |                         |        |               |        |          |
| <i>Piscihepevirus</i> |                         |        |               |        |          |
|                       | <i>Piscihepevirus A</i> | CTV-1  | Canada        | Salmon | MZ438685 |
|                       |                         | CTV-2b | Canada        | Salmon | MZ438686 |
|                       |                         | CTV-2b | Canada        | Salmon | MZ438687 |
|                       |                         | CTV-2b | Canada        | Salmon | MZ438688 |
|                       |                         | CTV-2b | Canada        | Salmon | MZ438689 |
|                       |                         | CTV-2b | Canada        | Salmon | MZ438690 |
|                       |                         | CTV-2b | Canada        | Salmon | MZ438691 |
|                       |                         | CTV-2a | Canada        | Salmon | MZ438692 |

**Table S3.** Primer and probe sequences for RT-qPCR assays used in this study

| <b>Name<sup>a</sup></b> | <b>Sequence (5'-3')</b>         |
|-------------------------|---------------------------------|
| ASHV_3848F              | CACCAGCTGCCGACTCAA              |
| ASHV_3989R              | TCGTCAGGAACCGCACAC              |
| ASHV_3493P              | FAM-CGCATCAACCAGGGATCCTT-MGBNFQ |
| CTV 4578F               | GTCTCYCTYGGCAAYGAGTTTCT         |
| CTV 4809R               | TCCTTTGAASAGSGCRAGRGCAT         |
| CTV 4730P               | FAM-GGCACMATGCTTTTCAA-MGBNFQ    |

<sup>a</sup> Primers and probe denoted with “ASHV” target CTV isolates from Western Canada while the “CTV” denoted primers and probe target CTV isolates from Eastern Canada.

**Table S4.** Experimental parameters of the conspecific cohabitation trial.

| <b>Species</b> | <b>No. of tanks</b> |                | <b>Tank volume<br/>(l)</b> | <b>No. of fish per tank</b> |                 | <b>Mean<br/>weight<br/>(g)</b> | <b>Stock<br/>Density<br/>(kg/m<sup>3</sup>)</b> |
|----------------|---------------------|----------------|----------------------------|-----------------------------|-----------------|--------------------------------|-------------------------------------------------|
|                | <b>Treatment</b>    | <b>Control</b> |                            | <b>Donor</b>                | <b>Sentinel</b> |                                |                                                 |
| Sockeye        | 2                   | 2              | 450                        | 21                          | 21              | 76                             | 8.8                                             |
| Pink           | 2                   | 2              | 50                         | 40                          | 40              | 12                             | 19.2                                            |
| Chinook        | 2                   | 2              | 350                        | 50                          | 50              | 43                             | 12.3                                            |

**Table S5.** Prevalence (%) of CTV-2 in Sockeye, Pink, and Chinook Salmon mucus in conspecific cohabitation challenge. Six fish were sampled per treatment at each timepoint with the exception of 12 wpi when five Chinook donor fish were sampled. NA denotes samples were not screened.

| <b>Weeks<br/>Post-<br/>Injection</b> | <b>Sockeye</b> |                 | <b>Pink</b>  |                 | <b>Chinook</b> |                 |
|--------------------------------------|----------------|-----------------|--------------|-----------------|----------------|-----------------|
|                                      | <b>Donor</b>   | <b>Sentinel</b> | <b>Donor</b> | <b>Sentinel</b> | <b>Donor</b>   | <b>Sentinel</b> |

|    |     |    |    |    |     |    |
|----|-----|----|----|----|-----|----|
| 1  | 83  | 50 | 83 | 17 | 100 | 17 |
| 2  | 100 | 0  | 17 | 0  | 100 | 50 |
| 4  | 83  | 67 | 67 | 0  | 67  | 33 |
| 6  | 50  | NA | 33 | NA | 67  | 17 |
| 12 | 17  | NA | 0  | NA | 20  | 17 |
| 14 | 33  | NA | 17 | NA | 50  | 83 |
| 16 | 83  | NA | 17 | NA | 83  | 67 |
| 18 | 17  | NA | 0  | NA | 33  | 17 |

**Table S6.** Identification of PXXP motifs in Piscihepeviruses (GenBank accession #'s HQ731075, MN995808, MZ438685 - MZ438692) and Orthohepeviruses (HEV-1, 2, 3, 4, 5, 6, 7, B, C1, C2, D) isolates, respectively.

|                  | <b>ORF1 Non structural polyprotein</b> |                                                                                                             | <b>ORF2 Capsid</b> |                                                                                                                                      | <b>ORF3 Hypothetical protein</b> |                                                                |
|------------------|----------------------------------------|-------------------------------------------------------------------------------------------------------------|--------------------|--------------------------------------------------------------------------------------------------------------------------------------|----------------------------------|----------------------------------------------------------------|
|                  | Length (aa)                            | PXXP motif sites*                                                                                           | Length (aa)        | PXXP motif sites*                                                                                                                    | Length (aa)                      | PXXP motif sites*                                              |
| Piscihepeviruses | 1708-1713                              | P Y G P<br>P T/S A P#<br>P T/A L P<br>P V/I Q P<br>P A N/K P<br>P A V P<br>P A H P<br>P S D P               | 629-635            | P P K P<br>P D/N S P<br>P P Q/H P<br>P P G P<br>P S T P                                                                              | NA                               | NA                                                             |
| Orthohepeviruses | 1532-1709                              | P Y V/T P<br>P F/G S/A P<br>P A A/S P<br>P T/A L/S/Q/T P<br>P S/A/T L P<br>P P/A C/A/G P<br>P A/Q/L L/Q/P P | 607-675            | P M/S L/Y/S P<br>P A P P<br>P T N P<br>P F A P<br>P A/I/P R P<br>P L S P<br>P L/V N/S/G P<br>P L/P L/M P<br>P L/V-V<br>P S/A/V/K R P | 88-138                           | P S/L P/L/H P<br>P M S/F/P P<br>P L/Q/P/A R/H/P/C P<br>P S A P |

\*Only sites present in at least 2 isolates are listed

#a634-637



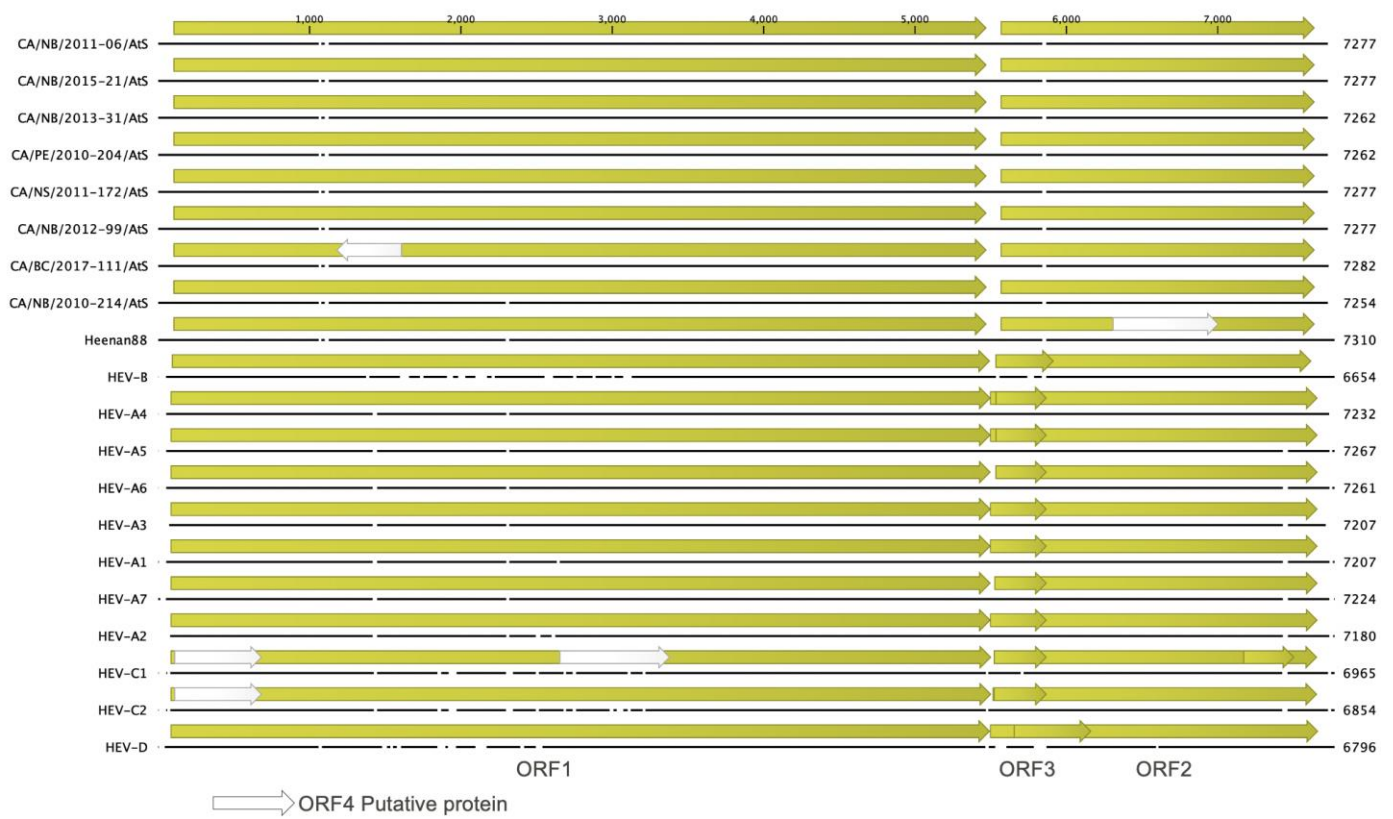

Figure S1. Alignment of the whole genome sequences including annotations of ORF1, ORF2 and ORF3 (when present). Putative protein ORF4s are indicated with white arrows.

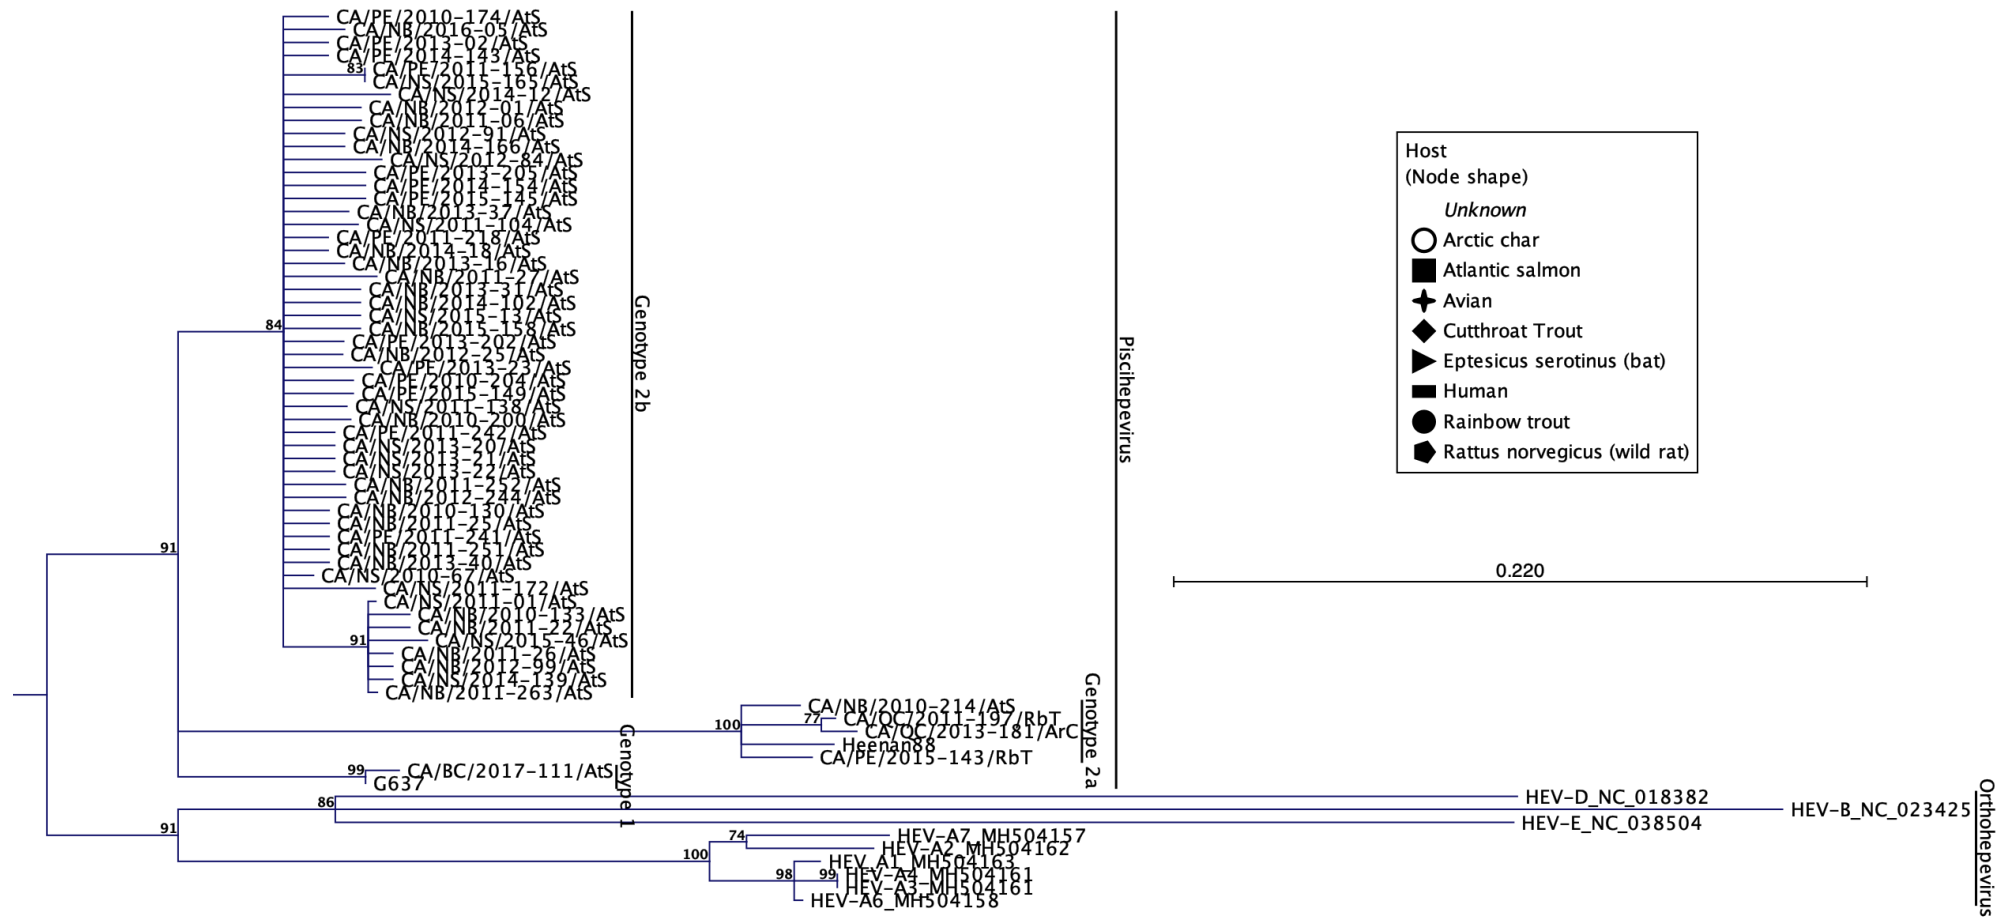

Figure S2. Phylogenetic tree showing the genetic relationship of 193 nt region of the RNA –dependent RNA polymerase of cutthroat trout virus isolates from Canada with other hepevirus isolates

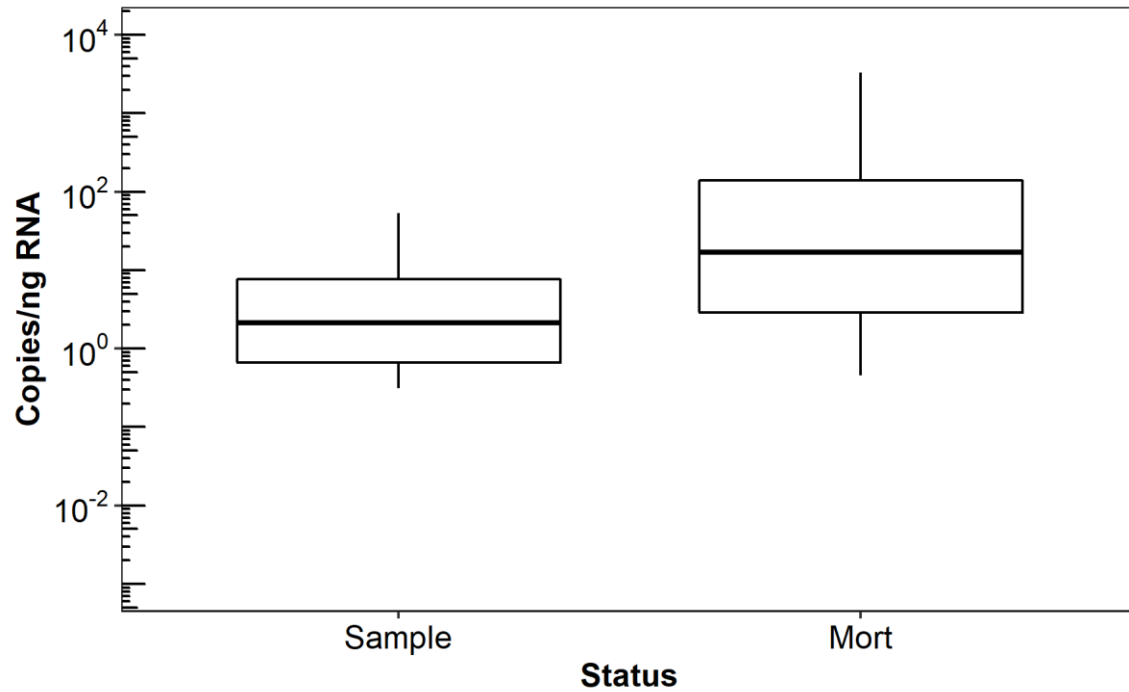

Figure S3. CTV-2 load in Atlantic salmon mortalities (n=9) and sampled fish (n=29) from the heterospecific cohabitation trial. Samples with RT-qPCR Ct values above the LOQ (54 c/rxn) were included in this analysis. Data are presented in box plots in which the inner horizontal line is the median, and the upper and lower boundaries of the box correspond to the first and third quartiles. The upper and lower whiskers denote the largest and smallest values no further than 1.5 times the inter-quartile range.

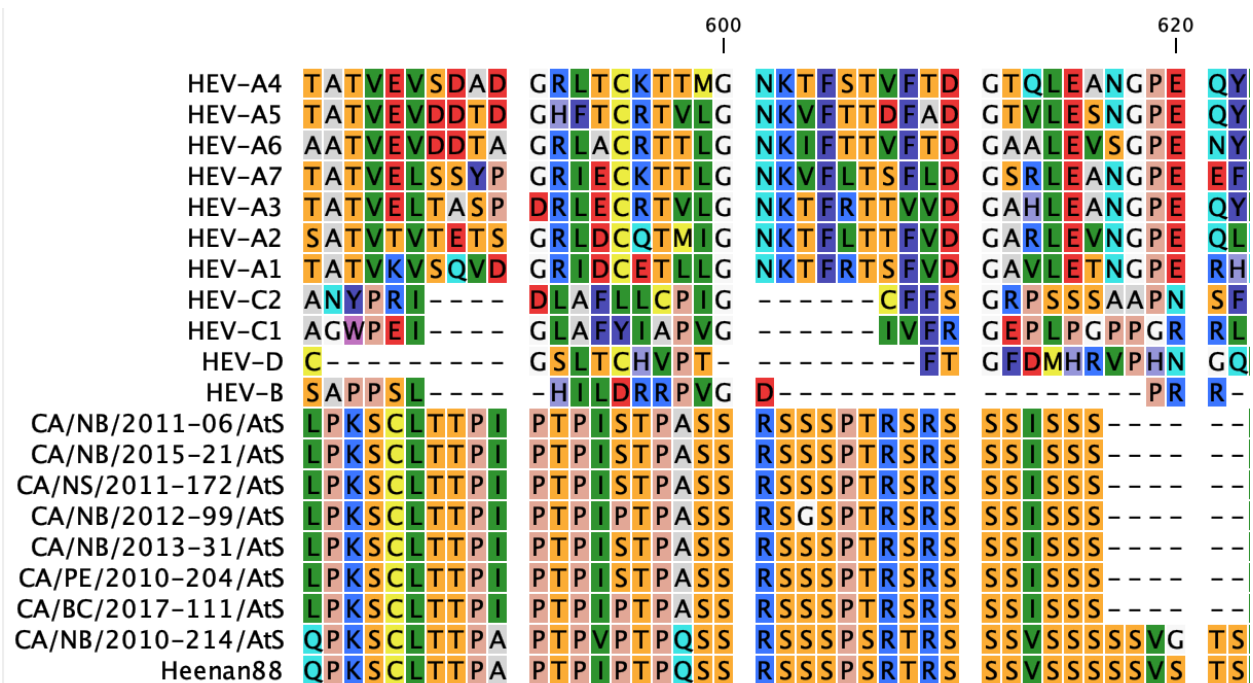

Figure S4. Amino acid alignment showing a serine rich region within the non-structural polyprotein of hepeviruses.
